# Supplementary material for: Sensitive and Specific Droplet Digital PCR Assays for Circulating Tumor HPV DNA: Development, Validation, and Clinical Application in HPV-Associated Cancers
Source: PubMed Central journal article supplement — Mol Diagn Ther. 2024 Sep 26;28(6):835–45. doi: 10.1007/s40291-024-00743-9 (PMC11512825; doi:10.1007/s40291-024-00743-9), 2024-09-26
Supplement: 40291_2024_743_MOESM1_ESM.pdf [file 40291_2024_743_MOESM1_ESM.pdf]

## Online resources

### *Molecular diagnosis and therapy*

#### Ultra-Sensitive Detection of Circulating Cell-Free Human Papilloma Virus DNA

Alvida Qvick <sup>1,\*</sup>, Elin Andersson <sup>2</sup>, Anna Oldaeus Almerén <sup>3</sup>, Max Waenerlund <sup>4,5</sup>, Bianca Stenmark <sup>1</sup>, Christina Karlsson <sup>6</sup>, Mats G Karlsson <sup>1</sup>, and Gisela Helenius <sup>7</sup>

<sup>1</sup> Department of Laboratory Medicine, Faculty of Medicine and Health, Örebro University, Örebro, Sweden

<sup>2</sup> Clinical Research Center, Örebro University Hospital, Örebro, Sweden

<sup>3</sup> Department of Otolaryngology, Faculty of Medicine and Health, Örebro University, Örebro, Sweden

<sup>4</sup> Department of Otolaryngology, Sahlgrenska University Hospital, Göteborg, Sweden

<sup>5</sup> Faculty of Medicine and Health, Örebro University, Örebro, Sweden

<sup>6</sup> School of Health Sciences, Örebro University, Örebro, Sweden

<sup>7</sup> ATMP Center, Skåne University Hospital, Lund, Sweden

\* Correspondence: [alvida.qvick@regionorebrolan.com](mailto:alvida.qvick@regionorebrolan.com)

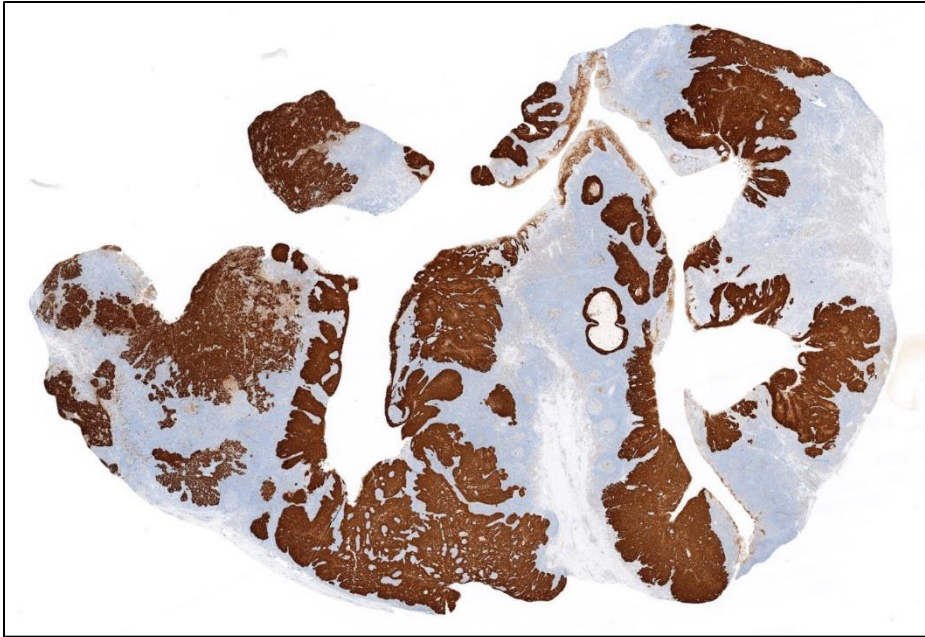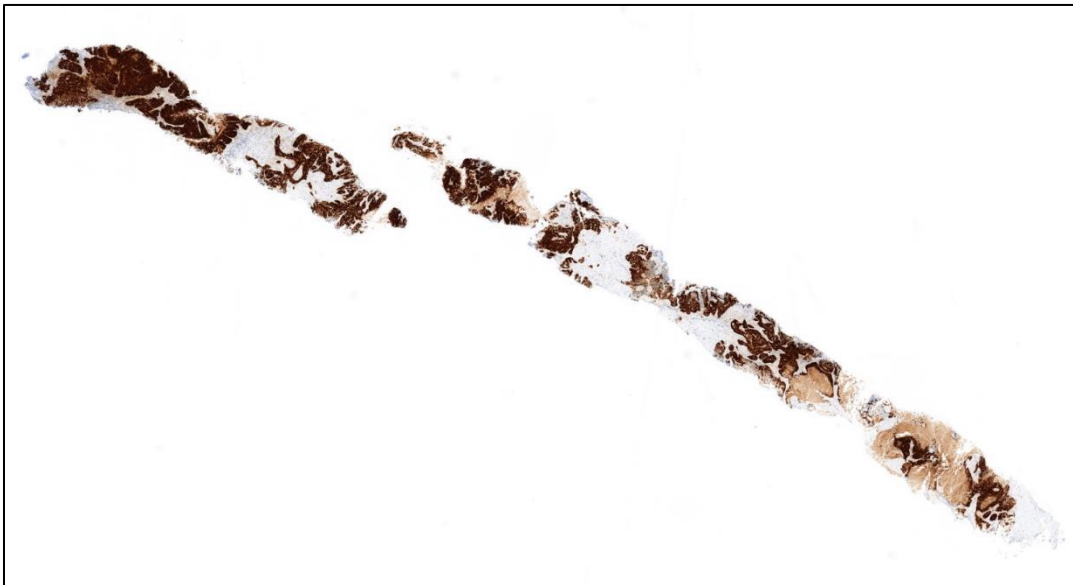

**Online resource 1** p16 Immunohistochemistry data. Two p16+ representative cases are shown.

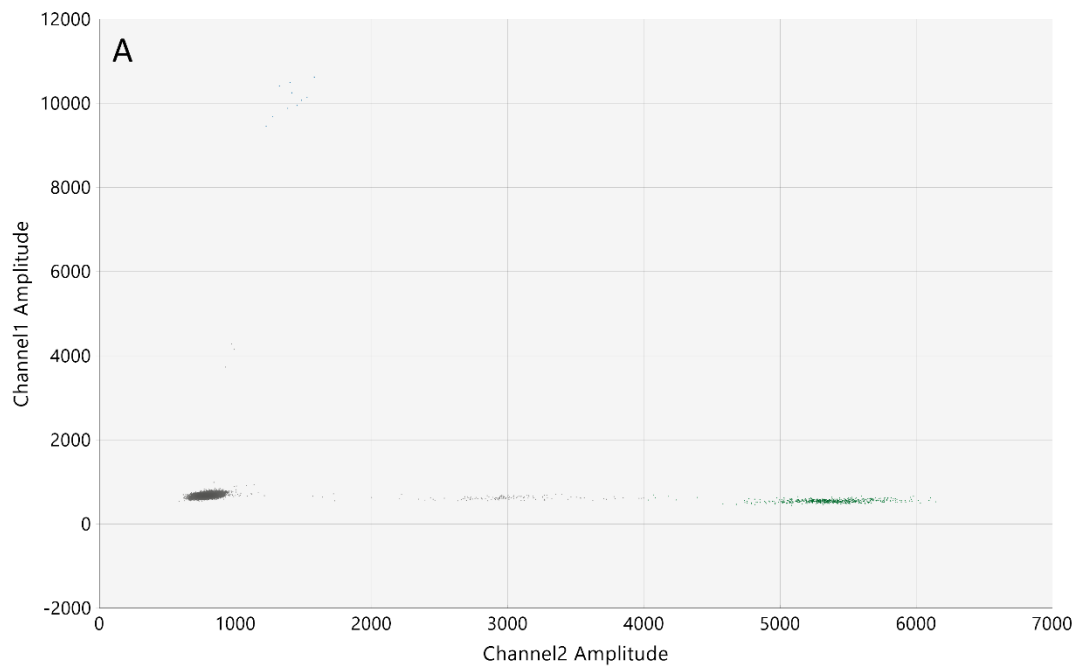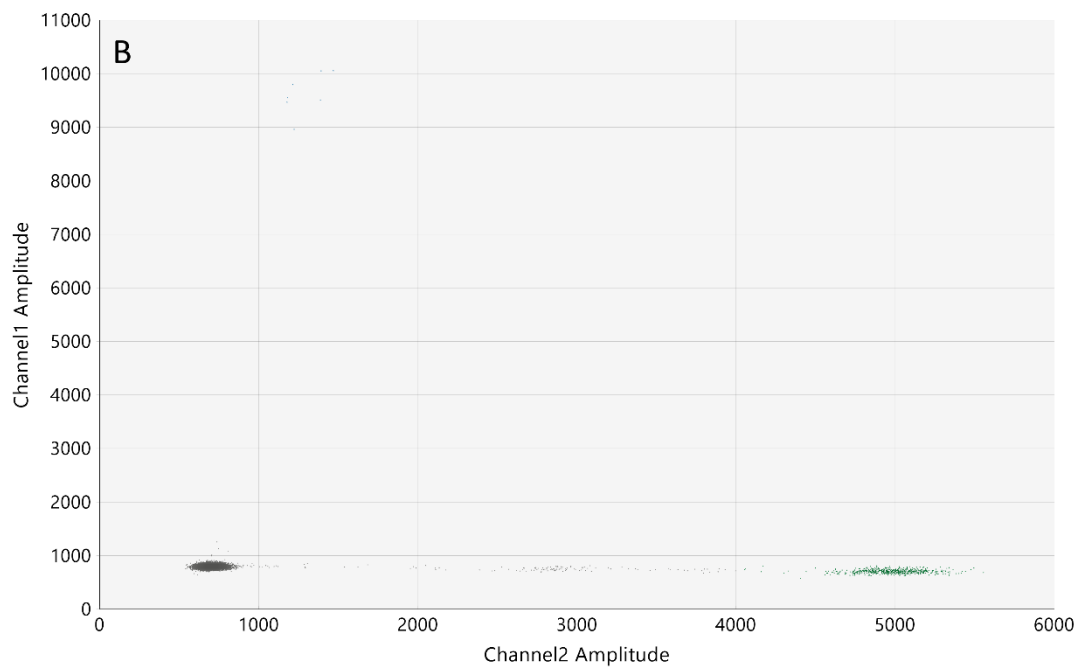

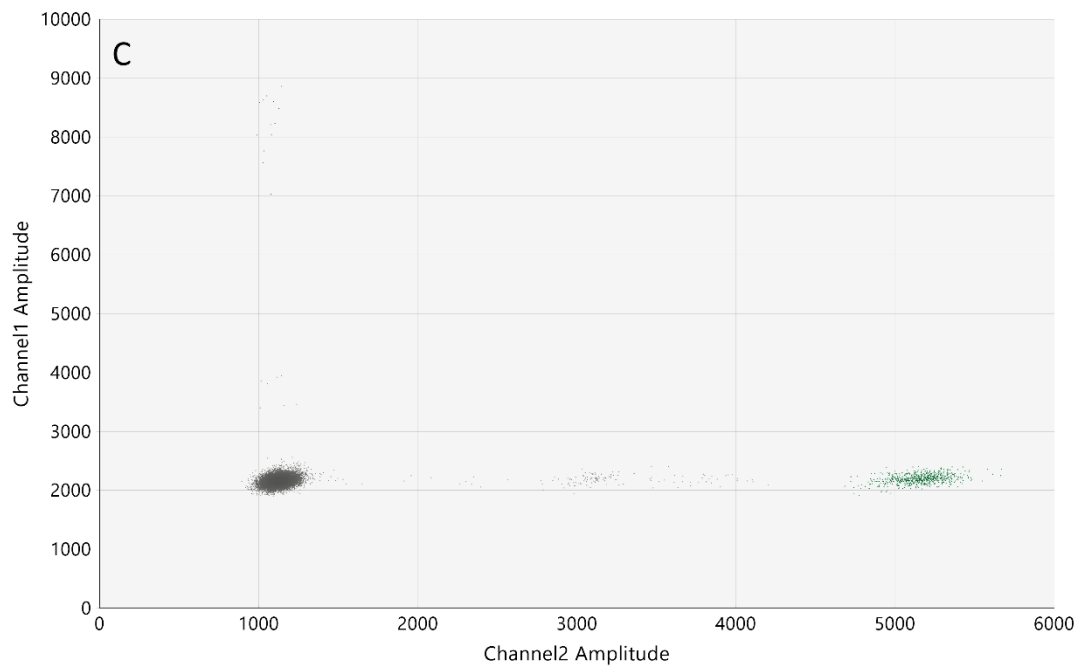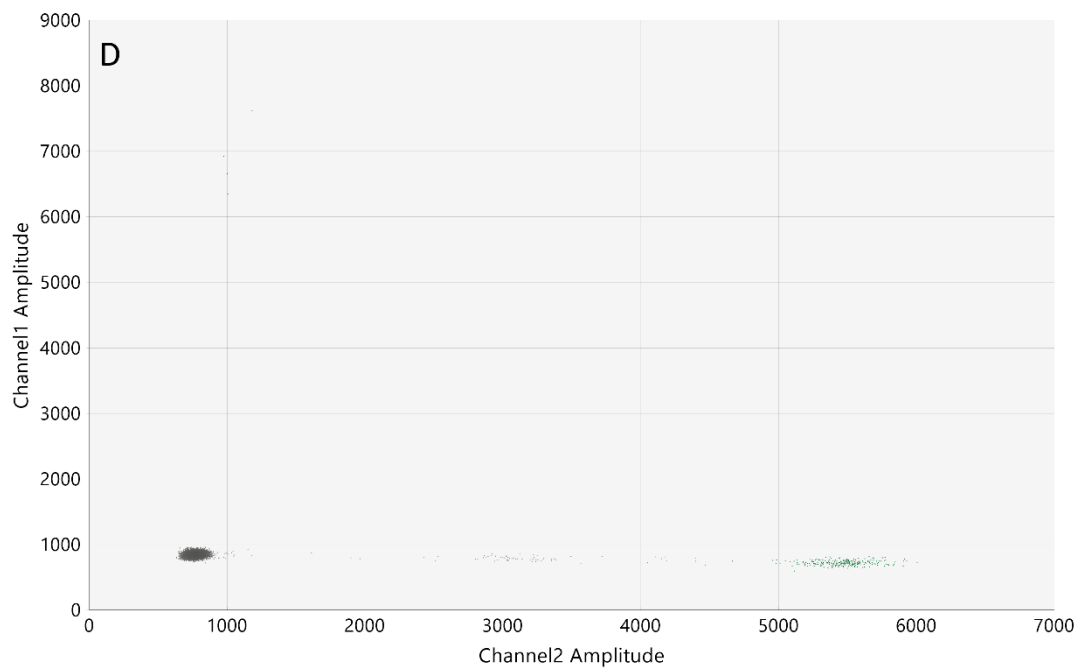

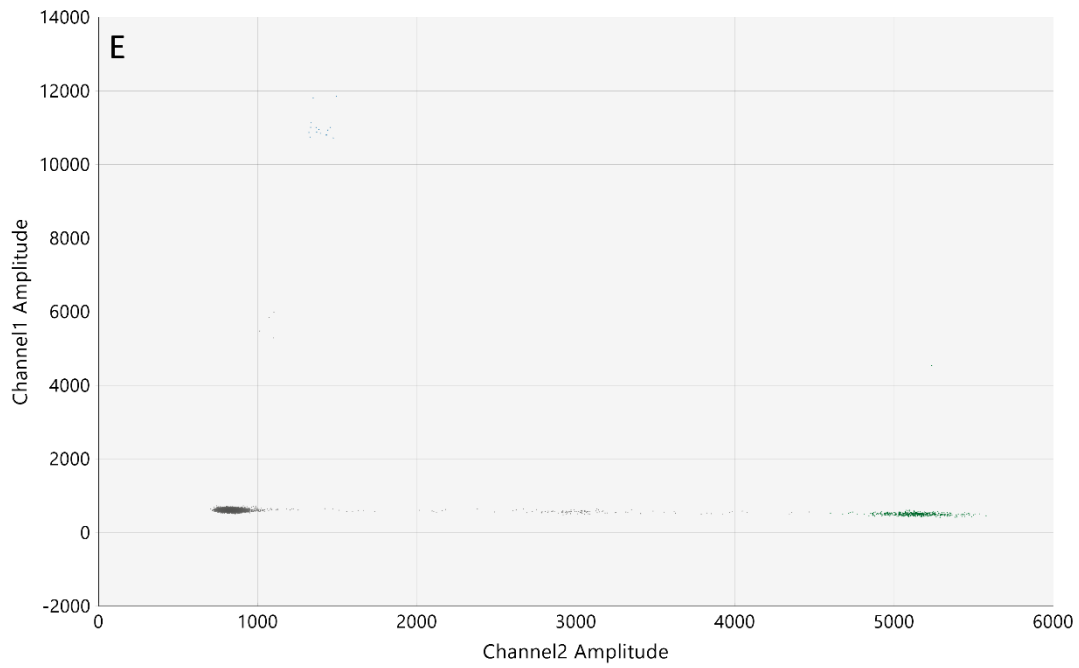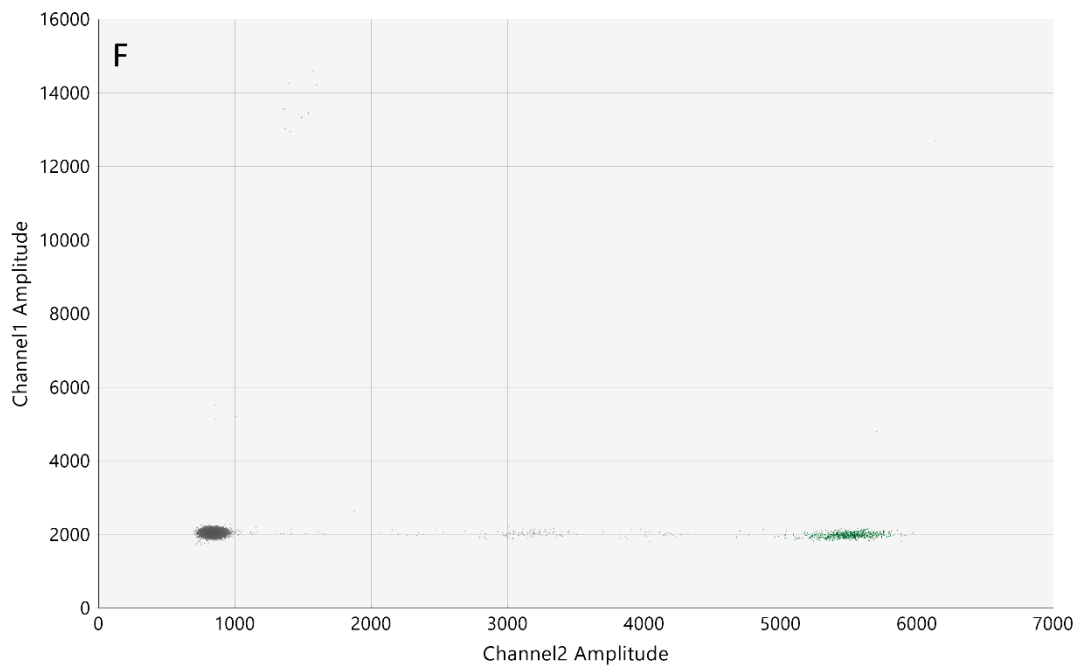

**Online resource 2** Raw data from ctHPV-DNA assays. Representative experiments from A) HPV16, B) HPV18, C) HPV33, D) HPV35, E) HPV56, and F) HPV59 are shown. Channel 1 shows ctHPV-DNA+ droplets and Channel 2 shows droplets positive for the human control sequence on 12q24.32.

**Online resource 3** Assay variation over time. Each assay was tested over time using one low HPV+ control and one higher HPV+ control. Each reaction included a human control sequence located on 12q24.32.

|                          | HPV16      |            | HPV18      |            | HPV33      |            | HPV35      |            | HPV56      |            | HPV59      |            |
|--------------------------|------------|------------|------------|------------|------------|------------|------------|------------|------------|------------|------------|------------|
| <b>Time points (n)</b>   | 21         |            | 6          |            | 6          |            | 6          |            | 3          |            | 5          |            |
| <b>Duration (months)</b> | 14         |            | 23         |            | 10         |            | 14         |            | 7          |            | 14         |            |
| <b>Target</b>            | <b>HPV</b> | <b>12q</b> |
| <b>HPV Low</b>           |            |            |            |            |            |            |            |            |            |            |            |            |
| Mean (copies/μl)         | 0.922      | 47.395     | 0.399      | 36.733     | 0.557      | 85.033     | 0.151      | 90.217     | 0.530      | 32.367     | 0.629      | 44.760     |
| SD                       | 0.163      | 3.262      | 0.109      | 5.056      | 0.092      | 3.054      | 0.072      | 4.140      | 0.098      | 1.319      | 0.083      | 1.266      |
| <b>HPV High</b>          |            |            |            |            |            |            |            |            |            |            |            |            |
| Mean (copies/μl)         | 1.620      | 55.000     | 1.938      | 58.15      | 1.702      | 78.733     | 0.654      | 90.183     | 2.26       | 33.067     | 2.024      | 43.120     |
| SD                       | 0.233      | 4.908      | 0.425      | 11.701     | 0.167      | 5.025      | 0.144      | 3.536      | 0.221      | 0.499      | 0.143      | 1.468      |

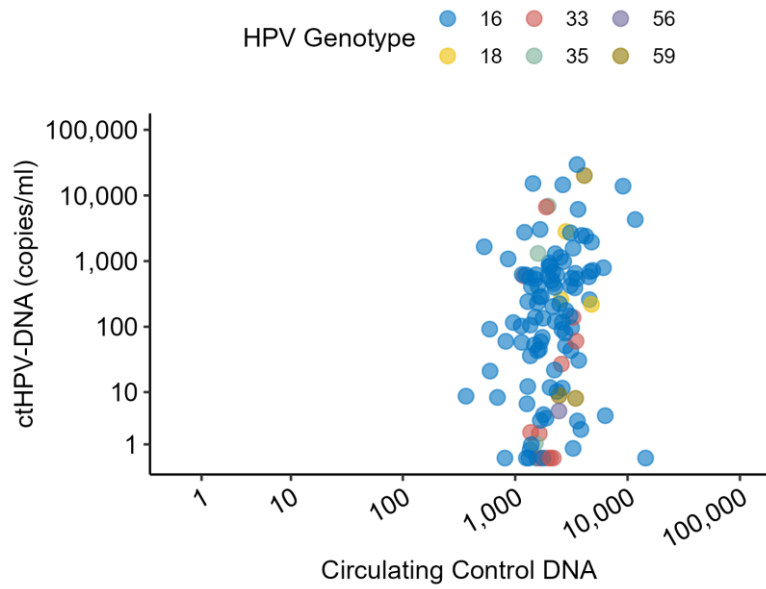

**Online resource 5** ctHPV-DNA and the total cfDNA concentration as measured by the human control sequence located on 12q24.32.

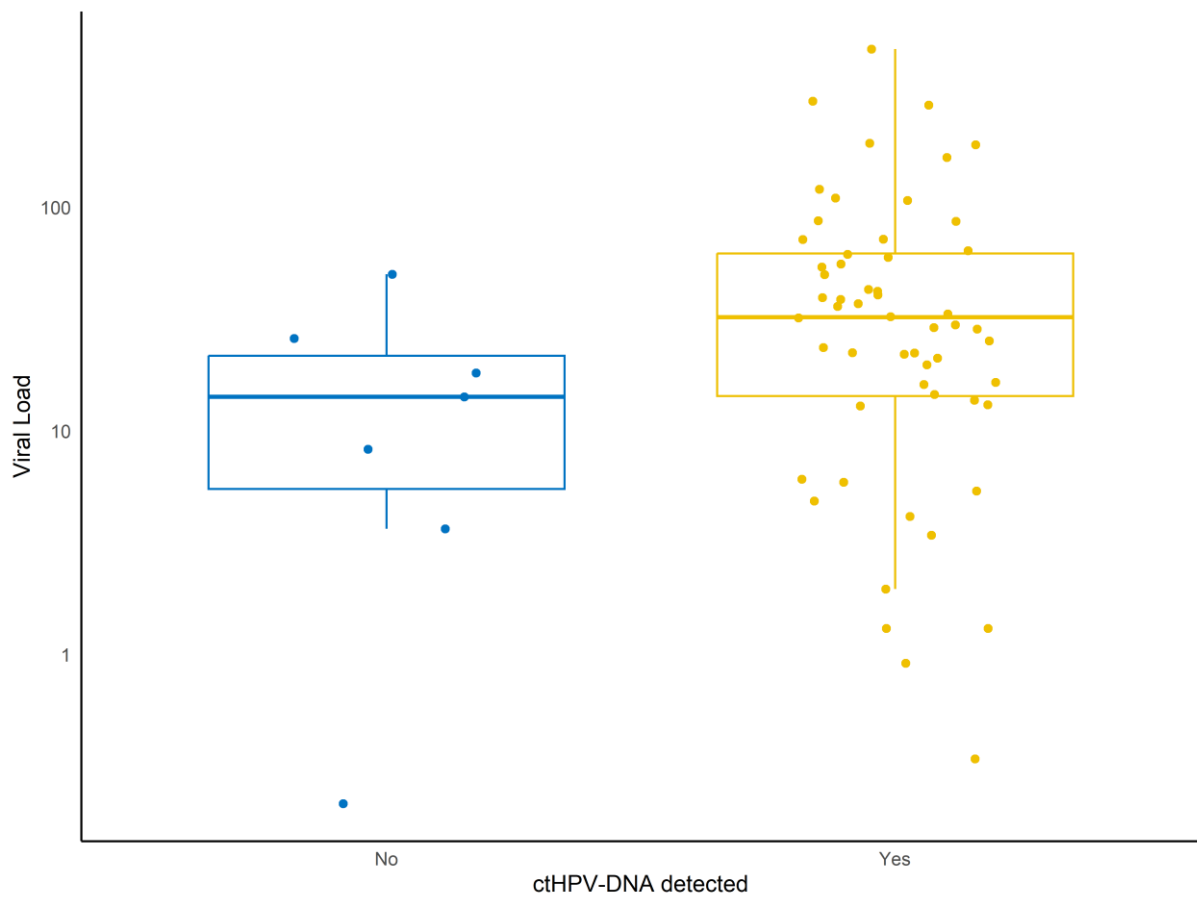

**Online resource 6** Viral load in ctHPV-DNA positive (n=56 ) and negative (n=7 ) cases.

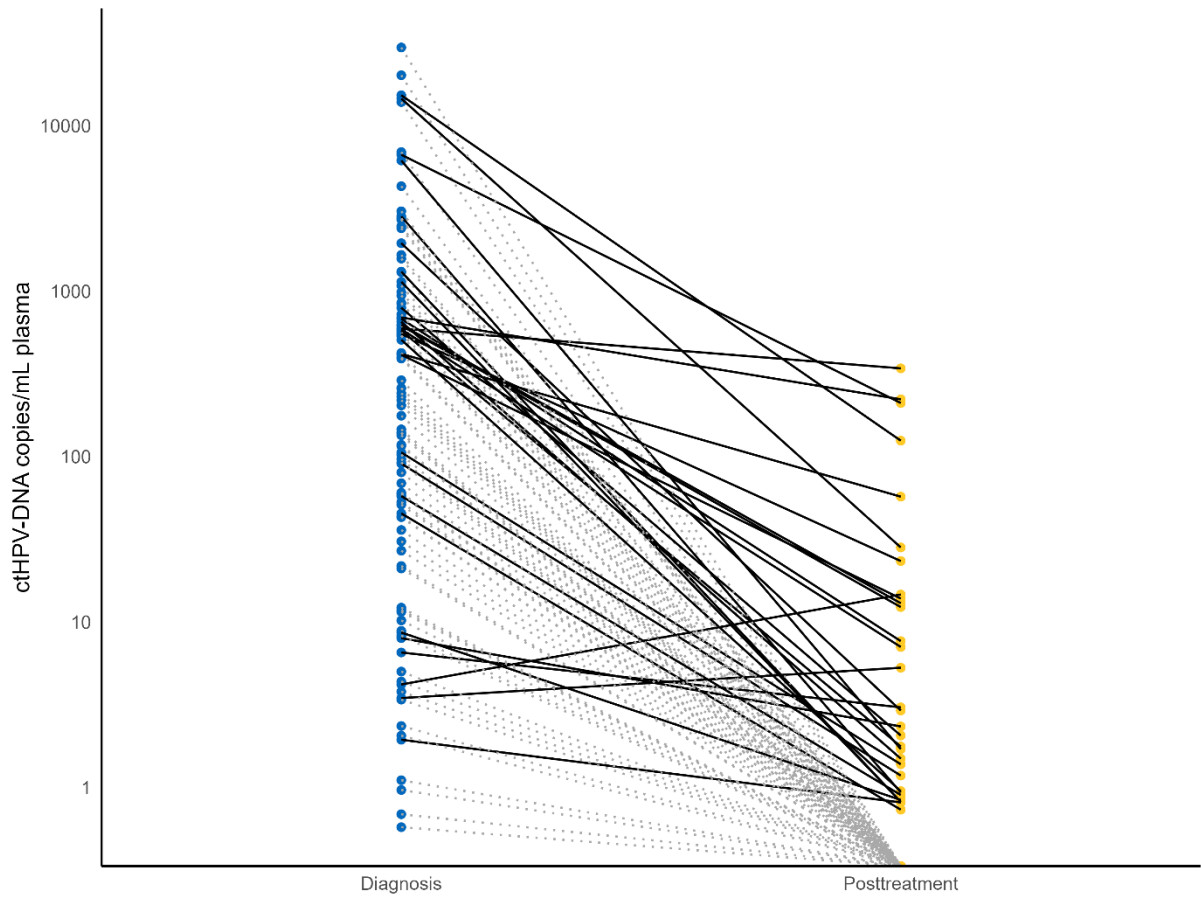

**Online resource 7** ctHPV-DNA levels at follow up (n=113). Diagnosis (blue) and posttreatment (yellow) are shown. Dotted grey lines represent samples with undetectable posttreatment ctHPV-DNA (n=82).
